# Supplementary material for: Malignancy rates in patients with rheumatoid arthritis treated with tocilizumab
Source: PubMed Central journal article supplement — RMD Open. 2016 May 10;2(1):e000213. doi: 10.1136/rmdopen-2015-000213 (PMC4874056; doi:10.1136/rmdopen-2015-000213), 2016-05-10
Supplement: rmdopen-2015-000213supp_tables.pdf [file rmdopen-2015-000213supp_tables.pdf]

## SUPPLEMENTARY MATERIALS

**Supplementary Table S1** Glossary of preferred terms contained in the malignant or unspecified tumors SMQ narrow basket label (MedDRA version 15.0)

| <b>Basket preferred term</b>                  |
|-----------------------------------------------|
| 5q minus syndrome                             |
| Abdominal neoplasm                            |
| Abdominal wall neoplasm                       |
| Abdominal wall neoplasm malignant             |
| Acral lentiginous melanoma stage I            |
| Acral lentiginous melanoma stage II           |
| Acral lentiginous melanoma stage III          |
| Acral lentiginous melanoma stage IV           |
| Acral lentiginous melanoma stage unspecified  |
| ACTH-producing pituitary tumour               |
| Acute biphenotypic leukaemia                  |
| Acute leukaemia                               |
| Acute leukaemia in remission                  |
| Acute lymphocytic leukaemia                   |
| Acute lymphocytic leukaemia (in remission)    |
| Acute lymphocytic leukaemia recurrent         |
| Acute megakaryocytic leukaemia                |
| Acute megakaryocytic leukaemia (in remission) |
| Acute monocytic leukaemia                     |
| Acute monocytic leukaemia (in remission)      |
| Acute myeloid leukaemia                       |
| Acute myeloid leukaemia (in remission)        |
| Acute myeloid leukaemia recurrent             |
| Acute myelomonocytic leukaemia                |
| Acute promyelocytic leukaemia                 |
| Adenocarcinoma                                |
| Adenocarcinoma of the cervix                  |
| Adenocarcinoma pancreas                       |
| Adenoid cystic carcinoma                      |
| Adenosquamous carcinoma of the cervix         |
| Adenosquamous cell carcinoma                  |
| Adenosquamous cell lung cancer                |
| Adenosquamous cell lung cancer recurrent      |
| Adenosquamous cell lung cancer stage 0        |
| Adenosquamous cell lung cancer stage I        |
| Adenosquamous cell lung cancer stage II       |
| Adenosquamous cell lung cancer stage III      |
| Adenosquamous cell lung cancer stage IV       |
| Adrenal carcinoma                             |

|                                                                  |
|------------------------------------------------------------------|
| Adrenal gland cancer metastatic                                  |
| Adrenal neoplasm                                                 |
| Adrenocortical carcinoma                                         |
| Adult T-cell lymphoma/leukaemia                                  |
| Adult T-cell lymphoma/leukaemia recurrent                        |
| Adult T-cell lymphoma/leukaemia refractory                       |
| Adult T-cell lymphoma/leukaemia stage I                          |
| Adult T-cell lymphoma/leukaemia stage II                         |
| Adult T-cell lymphoma/leukaemia stage III                        |
| Adult T-cell lymphoma/leukaemia stage IV                         |
| Aesthesioneuroblastoma                                           |
| Aleukaemic leukaemia                                             |
| Alveolar soft part sarcoma                                       |
| Alveolar soft part sarcoma metastatic                            |
| Alveolar soft part sarcoma non-metastatic                        |
| Alveolar soft part sarcoma recurrent                             |
| Anal cancer                                                      |
| Anal cancer metastatic                                           |
| Anal cancer recurrent                                            |
| Anal cancer stage 0                                              |
| Anal cancer stage I                                              |
| Anal cancer stage II                                             |
| Anal cancer stage III                                            |
| Anal cancer stage IV                                             |
| Anal neoplasm                                                    |
| Anaplastic astrocytoma                                           |
| Anaplastic large cell lymphoma T- and null-cell types            |
| Anaplastic large cell lymphoma T- and null-cell types recurrent  |
| Anaplastic large cell lymphoma T- and null-cell types refractory |
| Anaplastic large cell lymphoma T- and null-cell types stage I    |
| Anaplastic large cell lymphoma T- and null-cell types stage II   |
| Anaplastic large cell lymphoma T- and null-cell types stage III  |
| Anaplastic large cell lymphoma T- and null-cell types stage IV   |
| Angiocentric lymphoma                                            |
| Angiocentric lymphoma recurrent                                  |
| Angiocentric lymphoma refractory                                 |
| Angiocentric lymphoma stage I                                    |
| Angiocentric lymphoma stage II                                   |
| Angiocentric lymphoma stage III                                  |
| Angiocentric lymphoma stage IV                                   |
| Angioimmunoblastic T-cell lymphoma                               |
| Angioimmunoblastic T-cell lymphoma recurrent                     |
| Angioimmunoblastic T-cell lymphoma refractory                    |
| Angioimmunoblastic T-cell lymphoma stage I                       |

|                                              |
|----------------------------------------------|
| Angioimmunoblastic T-cell lymphoma stage II  |
| Angioimmunoblastic T-cell lymphoma stage III |
| Angioimmunoblastic T-cell lymphoma stage IV  |
| Angiosarcoma                                 |
| Angiosarcoma metastatic                      |
| Angiosarcoma non-metastatic                  |
| Angiosarcoma recurrent                       |
| Apudoma                                      |
| Astrocytoma                                  |
| Astrocytoma malignant                        |
| Atypical fibroxanthoma                       |
| B precursor type acute leukaemia             |
| B-cell lymphoma                              |
| B-cell lymphoma recurrent                    |
| B-cell lymphoma refractory                   |
| B-cell lymphoma stage I                      |
| B-cell lymphoma stage II                     |
| B-cell lymphoma stage III                    |
| B-cell lymphoma stage IV                     |
| B-cell small lymphocytic lymphoma            |
| B-cell small lymphocytic lymphoma recurrent  |
| B-cell small lymphocytic lymphoma refractory |
| B-cell small lymphocytic lymphoma stage I    |
| B-cell small lymphocytic lymphoma stage II   |
| B-cell small lymphocytic lymphoma stage III  |
| B-cell small lymphocytic lymphoma stage IV   |
| B-cell type acute leukaemia                  |
| B-cell unclassifiable lymphoma high grade    |
| B-cell unclassifiable lymphoma low grade     |
| Basal cell carcinoma                         |
| Basosquamous carcinoma                       |
| Basosquamous carcinoma of skin               |
| Bile duct cancer                             |
| Bile duct cancer non-resectable              |
| Bile duct cancer recurrent                   |
| Bile duct cancer resectable                  |
| Bile duct cancer stage 0                     |
| Bile duct cancer stage I                     |
| Bile duct cancer stage II                    |
| Bile duct cancer stage III                   |
| Bile duct cancer stage IV                    |
| Biliary cancer metastatic                    |
| Biliary neoplasm                             |
| Bladder adenocarcinoma recurrent             |

|                                                   |
|---------------------------------------------------|
| Bladder adenocarcinoma stage 0                    |
| Bladder adenocarcinoma stage I                    |
| Bladder adenocarcinoma stage II                   |
| Bladder adenocarcinoma stage III                  |
| Bladder adenocarcinoma stage IV                   |
| Bladder adenocarcinoma stage unspecified          |
| Bladder cancer                                    |
| Bladder cancer recurrent                          |
| Bladder cancer stage 0, with cancer in situ       |
| Bladder cancer stage 0, without cancer in situ    |
| Bladder cancer stage I, with cancer in situ       |
| Bladder cancer stage I, without cancer in situ    |
| Bladder cancer stage II                           |
| Bladder cancer stage III                          |
| Bladder cancer stage IV                           |
| Bladder neoplasm                                  |
| Bladder squamous cell carcinoma recurrent         |
| Bladder squamous cell carcinoma stage 0           |
| Bladder squamous cell carcinoma stage I           |
| Bladder squamous cell carcinoma stage II          |
| Bladder squamous cell carcinoma stage III         |
| Bladder squamous cell carcinoma stage IV          |
| Bladder squamous cell carcinoma stage unspecified |
| Bladder transitional cell carcinoma               |
| Bladder transitional cell carcinoma metastatic    |
| Bladder transitional cell carcinoma recurrent     |
| Bladder transitional cell carcinoma stage 0       |
| Bladder transitional cell carcinoma stage I       |
| Bladder transitional cell carcinoma stage II      |
| Bladder transitional cell carcinoma stage III     |
| Bladder transitional cell carcinoma stage IV      |
| Blast cell crisis                                 |
| Blast crisis in myelogenous leukaemia             |
| Bone cancer metastatic                            |
| Bone giant cell tumour                            |
| Bone marrow leukaemic cell infiltration           |
| Bone marrow tumour cell infiltration              |
| Bone neoplasm                                     |
| Bone neoplasm malignant                           |
| Bone sarcoma                                      |
| Borderline ovarian tumour                         |
| Bowen's disease                                   |
| Brain cancer metastatic                           |
| Brain neoplasm                                    |

|                                                |
|------------------------------------------------|
| Brain neoplasm malignant                       |
| Brain stem glioma                              |
| Brain teratoma                                 |
| Breast cancer                                  |
| Breast cancer female                           |
| Breast cancer in situ                          |
| Breast cancer male                             |
| Breast cancer metastatic                       |
| Breast cancer recurrent                        |
| Breast cancer stage I                          |
| Breast cancer stage II                         |
| Breast cancer stage III                        |
| Breast cancer stage IV                         |
| Breast neoplasm                                |
| Breast sarcoma                                 |
| Breast sarcoma metastatic                      |
| Breast sarcoma recurrent                       |
| Bronchial carcinoma                            |
| Bronchial neoplasm                             |
| Bronchioloalveolar carcinoma                   |
| Burkitt's leukaemia                            |
| Burkitt's lymphoma                             |
| Burkitt's lymphoma recurrent                   |
| Burkitt's lymphoma refractory                  |
| Burkitt's lymphoma stage I                     |
| Burkitt's lymphoma stage II                    |
| Burkitt's lymphoma stage III                   |
| Burkitt's lymphoma stage IV                    |
| Buschke-Lowenstein's tumour                    |
| Cancer in remission                            |
| Carcinoid tumour                               |
| Carcinoid tumour of the appendix               |
| Carcinoid tumour of the caecum                 |
| Carcinoid tumour of the duodenum               |
| Carcinoid tumour of the gastrointestinal tract |
| Carcinoid tumour of the pancreas               |
| Carcinoid tumour of the prostate               |
| Carcinoid tumour of the small bowel            |
| Carcinoid tumour of the stomach                |
| Carcinoid tumour pulmonary                     |
| Carcinoma in situ                              |
| Carcinoma in situ of eye                       |
| Carcinoma in situ of penis                     |
| Carcinoma in situ of skin                      |

|                                              |
|----------------------------------------------|
| Carcinoma in situ of trachea                 |
| Cardiac neoplasm malignant                   |
| Cardiac neoplasm unspecified                 |
| Cardiac teratoma                             |
| Carotid body tumour                          |
| Cartilage neoplasm                           |
| Central nervous system lymphoma              |
| Central nervous system neoplasm              |
| Cerebellar tumour                            |
| Cerebellopontine angle tumour                |
| Cerebral neuroblastoma                       |
| Cervix cancer metastatic                     |
| Cervix carcinoma                             |
| Cervix carcinoma recurrent                   |
| Cervix carcinoma stage 0                     |
| Cervix carcinoma stage I                     |
| Cervix carcinoma stage II                    |
| Cervix carcinoma stage III                   |
| Cervix carcinoma stage IV                    |
| Cervix neoplasm                              |
| Chloroma                                     |
| Chloroma (in remission)                      |
| Chondrosarcoma                               |
| Chondrosarcoma metastatic                    |
| Chondrosarcoma recurrent                     |
| Chordoma                                     |
| Choriocarcinoma                              |
| Choroid melanoma                             |
| Choroid neoplasm                             |
| Choroid plexus carcinoma                     |
| Chronic eosinophilic leukaemia               |
| Chronic leukaemia                            |
| Chronic leukaemia in remission               |
| Chronic lymphocytic leukaemia                |
| Chronic lymphocytic leukaemia (in remission) |
| Chronic lymphocytic leukaemia recurrent      |
| Chronic lymphocytic leukaemia refractory     |
| Chronic lymphocytic leukaemia stage 0        |
| Chronic lymphocytic leukaemia stage 1        |
| Chronic lymphocytic leukaemia stage 2        |
| Chronic lymphocytic leukaemia stage 3        |
| Chronic lymphocytic leukaemia stage 4        |
| Chronic lymphocytic leukaemia transformation |
| Chronic myeloid leukaemia                    |

|                                                 |
|-------------------------------------------------|
| Chronic myeloid leukaemia (in remission)        |
| Chronic myeloid leukaemia transformation        |
| Chronic myelomonocytic leukaemia                |
| Chronic myelomonocytic leukaemia (in remission) |
| Clear cell endometrial carcinoma                |
| Clear cell sarcoma of the kidney                |
| CNS germinoma                                   |
| Colon cancer                                    |
| Colon cancer metastatic                         |
| Colon cancer recurrent                          |
| Colon cancer stage 0                            |
| Colon cancer stage I                            |
| Colon cancer stage II                           |
| Colon cancer stage III                          |
| Colon cancer stage IV                           |
| Colon neoplasm                                  |
| Colorectal cancer                               |
| Colorectal cancer metastatic                    |
| Colorectal cancer recurrent                     |
| Colorectal cancer stage I                       |
| Colorectal cancer stage II                      |
| Colorectal cancer stage III                     |
| Colorectal cancer stage IV                      |
| Colorectal carcinoma stage 0                    |
| Congenital fibrosarcoma                         |
| Congenital teratoma                             |
| Conjunctival melanoma                           |
| Conjunctival neoplasm                           |
| Conjunctival primary acquired melanosis         |
| Contralateral breast cancer                     |
| Dermatofibrosarcoma                             |
| Desmoplastic small round cell tumour            |
| Diaphragm neoplasm                              |
| Diffuse large B-cell lymphoma                   |
| Diffuse large B-cell lymphoma recurrent         |
| Diffuse large B-cell lymphoma refractory        |
| Diffuse large B-cell lymphoma stage I           |
| Diffuse large B-cell lymphoma stage II          |
| Diffuse large B-cell lymphoma stage III         |
| Diffuse large B-cell lymphoma stage IV          |
| Disseminated large cell lymphoma                |
| Duodenal neoplasm                               |
| Dysplastic naevus syndrome                      |
| Ear neoplasm                                    |

|                                                       |
|-------------------------------------------------------|
| Ear neoplasm malignant                                |
| Eccrine carcinoma                                     |
| Endocrine neoplasm                                    |
| Endocrine neoplasm malignant                          |
| Endometrial cancer                                    |
| Endometrial cancer metastatic                         |
| Endometrial cancer recurrent                          |
| Endometrial cancer stage 0                            |
| Endometrial cancer stage I                            |
| Endometrial cancer stage II                           |
| Endometrial cancer stage III                          |
| Endometrial cancer stage IV                           |
| Endometrial neoplasm                                  |
| Endometrial sarcoma                                   |
| Endometrial sarcoma metastatic                        |
| Endometrial sarcoma recurrent                         |
| Eosinophilic leukaemia                                |
| Ependymoma                                            |
| Ependymoma malignant                                  |
| Epididymal neoplasm                                   |
| Epiglottic carcinoma                                  |
| Epithelioid sarcoma                                   |
| Epithelioid sarcoma metastatic                        |
| Epithelioid sarcoma non-metastatic                    |
| Epithelioid sarcoma recurrent                         |
| Epstein-Barr virus associated lymphoma                |
| Erythraemic myelosis (in remission)                   |
| Erythroleukaemia                                      |
| Ewing's sarcoma                                       |
| Ewing's sarcoma metastatic                            |
| Ewing's sarcoma recurrent                             |
| Extra-osseous Ewing's sarcoma                         |
| Extra-osseous Ewing's sarcoma metastatic              |
| Extra-osseous Ewing's sarcoma non-metastatic          |
| Extra-osseous Ewing's sarcoma recurrent               |
| Extragenital primary embryonal carcinoma              |
| Extragenital primary germ cell cancer                 |
| Extragenital primary germ cell tumour mixed stage I   |
| Extragenital primary germ cell tumour mixed stage II  |
| Extragenital primary germ cell tumour mixed stage III |
| Extragenital primary malignant teratoma               |
| Extragenital primary non-seminoma                     |
| Extragenital primary non-seminoma stage I             |
| Extragenital primary non-seminoma stage II            |



|                                                                 |
|-----------------------------------------------------------------|
| Extragenadal primary non-seminoma stage III                     |
| Extragenadal primary non-seminoma stage IV                      |
| Extragenadal primary seminoma (pure) stage I                    |
| Extragenadal primary seminoma (pure) stage II                   |
| Extragenadal primary seminoma (pure) stage III                  |
| Extragenadal primary seminoma (pure) stage IV                   |
| Extramammary Paget's disease                                    |
| Extranodal marginal zone B-cell lymphoma (malt type)            |
| Extranodal marginal zone B-cell lymphoma (malt type) recurrent  |
| Extranodal marginal zone B-cell lymphoma (malt type) refractory |
| Extranodal marginal zone B-cell lymphoma (malt type) stage I    |
| Extranodal marginal zone B-cell lymphoma (malt type) stage II   |
| Extranodal marginal zone B-cell lymphoma (malt type) stage III  |
| Extranodal marginal zone B-cell lymphoma (malt type) stage IV   |
| Extranodal NK/T-cell lymphoma, nasal type                       |
| Extraocular retinoblastoma                                      |
| Extraskeletal chondrosarcoma                                    |
| Extraskeletal chondrosarcoma metastatic                         |
| Extraskeletal chondrosarcoma non-metastatic                     |
| Extraskeletal chondrosarcoma recurrent                          |
| Extraskeletal osteosarcoma                                      |
| Extraskeletal osteosarcoma metastatic                           |
| Extraskeletal osteosarcoma non-metastatic                       |
| Extraskeletal osteosarcoma recurrent                            |
| Eyelid tumour                                                   |
| Fallopian tube cancer                                           |
| Fallopian tube cancer metastatic                                |
| Fallopian tube cancer stage I                                   |
| Fallopian tube cancer stage II                                  |
| Fallopian tube cancer stage III                                 |
| Fallopian tube cancer stage IV                                  |
| Fallopian tube neoplasm                                         |
| Female reproductive neoplasm                                    |
| Female reproductive tract carcinoma in situ                     |
| Fibrosarcoma                                                    |
| Fibrosarcoma metastatic                                         |
| Fibrosarcoma non-metastatic                                     |
| Follicle centre lymphoma diffuse small cell lymphoma            |
| Follicle centre lymphoma diffuse small cell lymphoma recurrent  |
| Follicle centre lymphoma diffuse small cell lymphoma refractory |
| Follicle centre lymphoma diffuse small cell lymphoma stage I    |
| Follicle centre lymphoma diffuse small cell lymphoma stage II   |
| Follicle centre lymphoma diffuse small cell lymphoma stage III  |
| Follicle centre lymphoma diffuse small cell lymphoma stage IV   |

|                                                                  |
|------------------------------------------------------------------|
| Follicle centre lymphoma, follicular grade I, II, III            |
| Follicle centre lymphoma, follicular grade I, II, III recurrent  |
| Follicle centre lymphoma, follicular grade I, II, III refractory |
| Follicle centre lymphoma, follicular grade I, II, III stage I    |
| Follicle centre lymphoma, follicular grade I, II, III stage II   |
| Follicle centre lymphoma, follicular grade I, II, III stage III  |
| Follicle centre lymphoma, follicular grade I, II, III stage IV   |
| Gallbladder cancer                                               |
| Gallbladder cancer metastatic                                    |
| Gallbladder cancer non-resectable                                |
| Gallbladder cancer recurrent                                     |
| Gallbladder cancer stage 0                                       |
| Gallbladder cancer stage I                                       |
| Gallbladder cancer stage II                                      |
| Gallbladder cancer stage III                                     |
| Gallbladder cancer stage IV                                      |
| Ganglioneuroblastoma                                             |
| Gastric cancer                                                   |
| Gastric cancer recurrent                                         |
| Gastric cancer stage 0                                           |
| Gastric cancer stage I                                           |
| Gastric cancer stage II                                          |
| Gastric cancer stage III                                         |
| Gastric cancer stage IV                                          |
| Gastric neoplasm                                                 |
| Gastric sarcoma                                                  |
| Gastrinoma                                                       |
| Gastrinoma malignant                                             |
| Gastrointestinal cancer metastatic                               |
| Gastrointestinal carcinoma                                       |
| Gastrointestinal carcinoma in situ                               |
| Gastrointestinal neoplasm                                        |
| Gastrointestinal stromal cancer                                  |
| Gastrointestinal stromal tumour                                  |
| Gastrooesophageal cancer                                         |
| Genital neoplasm malignant female                                |
| Genital neoplasm malignant male                                  |
| Genitourinary tract neoplasm                                     |
| Germ cell cancer                                                 |
| Germ cell cancer metastatic                                      |
| Gestational trophoblastic tumour                                 |
| Gingival cancer                                                  |
| Glioblastoma                                                     |
| Glioblastoma multiforme                                          |

|                                                             |
|-------------------------------------------------------------|
| Glioma                                                      |
| Gliomatosis cerebri                                         |
| Glioneuronal tumour                                         |
| Gliosarcoma                                                 |
| Glottis carcinoma                                           |
| Glucagonoma                                                 |
| Granular cell tumour                                        |
| Growth hormone-producing pituitary tumour                   |
| Haemangiopericytoma                                         |
| Haemangiopericytoma of meninges                             |
| Haematological malignancy                                   |
| Haematopoietic neoplasm                                     |
| Hairy cell leukaemia                                        |
| Head and neck cancer                                        |
| Head and neck cancer metastatic                             |
| Head and neck cancer stage I                                |
| Head and neck cancer stage II                               |
| Head and neck cancer stage III                              |
| Head and neck cancer stage IV                               |
| Hepatic angiosarcoma                                        |
| Hepatic cancer metastatic                                   |
| Hepatic cancer stage I                                      |
| Hepatic cancer stage II                                     |
| Hepatic cancer stage III                                    |
| Hepatic cancer stage IV                                     |
| Hepatic neoplasm                                            |
| Hepatic neoplasm malignant                                  |
| Hepatic neoplasm malignant non-resectable                   |
| Hepatic neoplasm malignant recurrent                        |
| Hepatic neoplasm malignant resectable                       |
| Hepatobiliary carcinoma in situ                             |
| Hepatobiliary neoplasm                                      |
| Hepatoblastoma                                              |
| Hepatoblastoma recurrent                                    |
| Hepatosplenic T-cell lymphoma                               |
| Hereditary leiomyomatosis renal cell carcinoma              |
| Hereditary papillary renal carcinoma                        |
| High grade B-cell lymphoma Burkitt-like lymphoma            |
| High grade B-cell lymphoma Burkitt-like lymphoma recurrent  |
| High grade B-cell lymphoma Burkitt-like lymphoma refractory |
| High grade B-cell lymphoma Burkitt-like lymphoma stage I    |
| High grade B-cell lymphoma Burkitt-like lymphoma stage II   |
| High grade B-cell lymphoma Burkitt-like lymphoma stage III  |
| High grade B-cell lymphoma Burkitt-like lymphoma stage IV   |

|                                                                   |
|-------------------------------------------------------------------|
| Histiocytic medullary reticulosis                                 |
| Hodgkin's disease                                                 |
| Hodgkin's disease lymphocyte depletion stage I site unspecified   |
| Hodgkin's disease lymphocyte depletion stage I subdiaphragm       |
| Hodgkin's disease lymphocyte depletion stage I supradiaphragm     |
| Hodgkin's disease lymphocyte depletion stage II site unspecified  |
| Hodgkin's disease lymphocyte depletion stage II subdiaphragm      |
| Hodgkin's disease lymphocyte depletion stage II supradiaphragm    |
| Hodgkin's disease lymphocyte depletion type recurrent             |
| Hodgkin's disease lymphocyte depletion type refractory            |
| Hodgkin's disease lymphocyte depletion type stage III             |
| Hodgkin's disease lymphocyte depletion type stage IV              |
| Hodgkin's disease lymphocyte depletion type stage unspecified     |
| Hodgkin's disease lymphocyte predominance stage I site unspec     |
| Hodgkin's disease lymphocyte predominance stage I subdiaphragm    |
| Hodgkin's disease lymphocyte predominance stage I supradiaphragm  |
| Hodgkin's disease lymphocyte predominance stage II site unspec    |
| Hodgkin's disease lymphocyte predominance stage II subdiaphragm   |
| Hodgkin's disease lymphocyte predominance stage II supradiaphragm |
| Hodgkin's disease lymphocyte predominance type recurrent          |
| Hodgkin's disease lymphocyte predominance type refractory         |
| Hodgkin's disease lymphocyte predominance type stage III          |
| Hodgkin's disease lymphocyte predominance type stage IV           |
| Hodgkin's disease lymphocyte predominance type stage unspecified  |
| Hodgkin's disease mixed cellularity recurrent                     |
| Hodgkin's disease mixed cellularity refractory                    |
| Hodgkin's disease mixed cellularity stage I site unspecified      |
| Hodgkin's disease mixed cellularity stage I subdiaphragmatic      |
| Hodgkin's disease mixed cellularity stage I supradiaphragmatic    |
| Hodgkin's disease mixed cellularity stage II subdiaphragmatic     |
| Hodgkin's disease mixed cellularity stage II supradiaphragmatic   |
| Hodgkin's disease mixed cellularity stage III                     |
| Hodgkin's disease mixed cellularity stage IV                      |
| Hodgkin's disease mixed cellularity stage unspecified             |
| Hodgkin's disease nodular sclerosis recurrent                     |
| Hodgkin's disease nodular sclerosis refractory                    |
| Hodgkin's disease nodular sclerosis stage I site unspecified      |
| Hodgkin's disease nodular sclerosis stage I subdiaphragmatic      |
| Hodgkin's disease nodular sclerosis stage I supradiaphragmatic    |
| Hodgkin's disease nodular sclerosis stage II subdiaphragmatic     |
| Hodgkin's disease nodular sclerosis stage II supradiaphragmatic   |
| Hodgkin's disease nodular sclerosis stage III                     |
| Hodgkin's disease nodular sclerosis stage IV                      |
| Hodgkin's disease nodular sclerosis stage unspecified             |

|                                                                 |
|-----------------------------------------------------------------|
| Hodgkin's disease recurrent                                     |
| Hodgkin's disease refractory                                    |
| Hodgkin's disease stage I                                       |
| Hodgkin's disease stage II                                      |
| Hodgkin's disease stage III                                     |
| Hodgkin's disease stage IV                                      |
| Hodgkin's disease unclassifiable                                |
| Hormone-secreting ovarian tumour                                |
| Hypopharyngeal cancer                                           |
| Hypopharyngeal cancer recurrent                                 |
| Hypopharyngeal cancer stage 0                                   |
| Hypopharyngeal cancer stage I                                   |
| Hypopharyngeal cancer stage II                                  |
| Hypopharyngeal cancer stage III                                 |
| Hypopharyngeal cancer stage IV                                  |
| Hypopharyngeal neoplasm                                         |
| Immunoblastic lymphoma                                          |
| Inflammatory carcinoma of breast recurrent                      |
| Inflammatory carcinoma of breast stage III                      |
| Inflammatory carcinoma of breast stage IV                       |
| Inflammatory carcinoma of the breast                            |
| Inflammatory myofibroblastic tumour                             |
| Insulinoma                                                      |
| Intestinal adenocarcinoma                                       |
| Intestinal T-cell lymphoma                                      |
| Intestinal T-cell lymphoma recurrent                            |
| Intestinal T-cell lymphoma refractory                           |
| Intestinal T-cell lymphoma stage I                              |
| Intestinal T-cell lymphoma stage II                             |
| Intestinal T-cell lymphoma stage III                            |
| Intestinal T-cell lymphoma stage IV                             |
| Intracranial meningioma malignant                               |
| Intraocular melanoma                                            |
| Intraocular retinoblastoma                                      |
| Iris neoplasm                                                   |
| Iritic melanoma                                                 |
| Juvenile chronic myelomonocytic leukaemia                       |
| Kaposi's sarcoma                                                |
| Kaposi's sarcoma aids related                                   |
| Kaposi's sarcoma classical type                                 |
| Keratoacanthoma                                                 |
| Lacrimal duct neoplasm                                          |
| Langerhans' cell histiocytosis                                  |
| Large cell carcinoma of the respiratory tract stage unspecified |

|                                       |
|---------------------------------------|
| Large cell lung cancer metastatic     |
| Large cell lung cancer recurrent      |
| Large cell lung cancer stage 0        |
| Large cell lung cancer stage I        |
| Large cell lung cancer stage II       |
| Large cell lung cancer stage III      |
| Large cell lung cancer stage IV       |
| Large granular lymphocytosis          |
| Large intestine carcinoma             |
| Laryngeal cancer                      |
| Laryngeal cancer metastatic           |
| Laryngeal cancer recurrent            |
| Laryngeal cancer stage 0              |
| Laryngeal cancer stage I              |
| Laryngeal cancer stage II             |
| Laryngeal cancer stage III            |
| Laryngeal cancer stage IV             |
| Laryngeal neoplasm                    |
| Leiomyosarcoma                        |
| Leiomyosarcoma metastatic             |
| Leiomyosarcoma non-metastatic         |
| Leiomyosarcoma recurrent              |
| Lentigo maligna recurrent             |
| Lentigo maligna stage I               |
| Lentigo maligna stage II              |
| Lentigo maligna stage III             |
| Lentigo maligna stage IV              |
| Lentigo maligna stage unspecified     |
| Leukaemia                             |
| Leukaemia basophilic                  |
| Leukaemia cutis                       |
| Leukaemia granulocytic                |
| Leukaemia in remission                |
| Leukaemia monocytic                   |
| Leukaemia plasmacytic                 |
| Leukaemia plasmacytic (in remission)  |
| Leukaemia recurrent                   |
| Leukaemic infiltration                |
| Leukaemic infiltration brain          |
| Leukaemic infiltration extramedullary |
| Leukaemic infiltration gingiva        |
| Leukaemic infiltration hepatic        |
| Leukaemic infiltration pulmonary      |
| Leukaemic infiltration renal          |

|                                                |
|------------------------------------------------|
| Leukaemic lymphoma                             |
| Leukaemic retinopathy                          |
| Linitis plastica                               |
| Lip and/or oral cavity cancer                  |
| Lip and/or oral cavity cancer recurrent        |
| Lip and/or oral cavity cancer stage 0          |
| Lip and/or oral cavity cancer stage I          |
| Lip and/or oral cavity cancer stage II         |
| Lip and/or oral cavity cancer stage III        |
| Lip and/or oral cavity cancer stage IV         |
| Lip neoplasm                                   |
| Lip neoplasm malignant stage unspecified       |
| Liposarcoma                                    |
| Liposarcoma metastatic                         |
| Liposarcoma non-metastatic                     |
| Liposarcoma recurrent                          |
| Liver carcinoma ruptured                       |
| Lung adenocarcinoma                            |
| Lung adenocarcinoma metastatic                 |
| Lung adenocarcinoma recurrent                  |
| Lung adenocarcinoma stage 0                    |
| Lung adenocarcinoma stage I                    |
| Lung adenocarcinoma stage II                   |
| Lung adenocarcinoma stage III                  |
| Lung adenocarcinoma stage IV                   |
| Lung cancer metastatic                         |
| Lung carcinoma cell type unspecified recurrent |
| Lung carcinoma cell type unspecified stage 0   |
| Lung carcinoma cell type unspecified stage I   |
| Lung carcinoma cell type unspecified stage II  |
| Lung carcinoma cell type unspecified stage III |
| Lung carcinoma cell type unspecified stage IV  |
| Lung infiltration malignant                    |
| Lung neoplasm                                  |
| Lung neoplasm malignant                        |
| Lung squamous cell carcinoma metastatic        |
| Lung squamous cell carcinoma recurrent         |
| Lung squamous cell carcinoma stage 0           |
| Lung squamous cell carcinoma stage I           |
| Lung squamous cell carcinoma stage II          |
| Lung squamous cell carcinoma stage III         |
| Lung squamous cell carcinoma stage IV          |
| Lung squamous cell carcinoma stage unspecified |
| Lymphangiosarcoma                              |

|                                                     |
|-----------------------------------------------------|
| Lymphangiosis carcinomatosa                         |
| Lymphatic system neoplasm                           |
| Lymphocytic leukaemia                               |
| Lymphocytic lymphoma                                |
| Lymphoid leukaemia (in remission)                   |
| Lymphoma                                            |
| Lymphoma aids related                               |
| Lymphoma cutis                                      |
| Lymphoma transformation                             |
| Lymphoplasmacytoid lymphoma/immunocytoma            |
| Lymphoplasmacytoid lymphoma/immunocytoma recurrent  |
| Lymphoplasmacytoid lymphoma/immunocytoma refractory |
| Lymphoplasmacytoid lymphoma/immunocytoma stage I    |
| Lymphoplasmacytoid lymphoma/immunocytoma stage II   |
| Lymphoplasmacytoid lymphoma/immunocytoma stage III  |
| Lymphoplasmacytoid lymphoma/immunocytoma stage IV   |
| Lymphoproliferative disorder                        |
| Lymphoproliferative disorder in remission           |
| Male reproductive tract carcinoma in situ           |
| Male reproductive tract neoplasm                    |
| Malignant anorectal neoplasm                        |
| Malignant cranial nerve neoplasm                    |
| Malignant fibrous histiocyoma                       |
| Malignant fibrous histiocyoma metastatic            |
| Malignant fibrous histiocyoma non-metastatic        |
| Malignant fibrous histiocyoma recurrent             |
| Malignant glioma                                    |
| Malignant haemangiopericytoma                       |
| Malignant haemangiopericytoma metastatic            |
| Malignant haemangiopericytoma non-metastatic        |
| Malignant haemangiopericytoma recurrent             |
| Malignant hepatobiliary neoplasm                    |
| Malignant histiocytosis                             |
| Malignant hydatidiform mole                         |
| Malignant lymphoid neoplasm                         |
| Malignant lymphoma unclassifiable high grade        |
| Malignant lymphoma unclassifiable low grade         |
| Malignant mast cell neoplasm                        |
| Malignant mediastinal neoplasm                      |
| Malignant melanoma                                  |
| Malignant melanoma in situ                          |
| Malignant melanoma of eyelid                        |
| Malignant melanoma of sites other than skin         |
| Malignant melanoma stage I                          |



|                                            |
|--------------------------------------------|
| Malignant melanoma stage II                |
| Malignant melanoma stage III               |
| Malignant melanoma stage IV                |
| Malignant mesenchymoma                     |
| Malignant mesenchymoma metastatic          |
| Malignant mesenchymoma non-metastatic      |
| Malignant mesenchymoma recurrent           |
| Malignant mesenteric neoplasm              |
| Malignant middle ear neoplasm              |
| Malignant muscle neoplasm                  |
| Malignant neoplasm of ampulla of vater     |
| Malignant neoplasm of auricular cartilage  |
| Malignant neoplasm of choroid              |
| Malignant neoplasm of conjunctiva          |
| Malignant neoplasm of cornea               |
| Malignant neoplasm of epididymis           |
| Malignant neoplasm of eye                  |
| Malignant neoplasm of eyelid               |
| Malignant neoplasm of islets of Langerhans |
| Malignant neoplasm of lacrimal duct        |
| Malignant neoplasm of lacrimal gland       |
| Malignant neoplasm of orbit                |
| Malignant neoplasm of paraurethral glands  |
| Malignant neoplasm of placenta             |
| Malignant neoplasm of pleura               |
| Malignant neoplasm of renal pelvis         |
| Malignant neoplasm of retina               |
| Malignant neoplasm of seminal vesicle      |
| Malignant neoplasm of spermatic cord       |
| Malignant neoplasm of spinal cord          |
| Malignant neoplasm of thorax               |
| Malignant neoplasm of uterine adnexa       |
| Malignant nervous system neoplasm          |
| Malignant nipple neoplasm                  |
| Malignant nipple neoplasm female           |
| Malignant nipple neoplasm male             |
| Malignant oligodendroglioma                |
| Malignant ovarian cyst                     |
| Malignant palate neoplasm                  |
| Malignant pericardial neoplasm             |
| Malignant peritoneal neoplasm              |
| Malignant pituitary tumour                 |
| Malignant respiratory tract neoplasm       |
| Malignant soft tissue neoplasm             |

|                                      |
|--------------------------------------|
| Malignant splenic neoplasm           |
| Malignant transformation             |
| Malignant urinary tract neoplasm     |
| Mantle cell lymphoma                 |
| Mantle cell lymphoma recurrent       |
| Mantle cell lymphoma refractory      |
| Mantle cell lymphoma stage I         |
| Mantle cell lymphoma stage II        |
| Mantle cell lymphoma stage III       |
| Mantle cell lymphoma stage IV        |
| Mastocytic leukaemia                 |
| Mature B-cell type acute leukaemia   |
| Maxillofacial sinus neoplasm         |
| Mediastinum neoplasm                 |
| Medulloblastoma                      |
| Medulloblastoma recurrent            |
| Melanoma recurrent                   |
| Melanomatous meningitis              |
| Meningeal neoplasm                   |
| Meningioma malignant                 |
| Mesenteric neoplasm                  |
| Mesothelioma                         |
| Mesothelioma malignancy unspecified  |
| Mesothelioma malignant               |
| Mesothelioma malignant advanced      |
| Mesothelioma malignant recurrent     |
| Metastases to abdominal cavity       |
| Metastases to abdominal wall         |
| Metastases to adrenals               |
| Metastases to biliary tract          |
| Metastases to bladder                |
| Metastases to bone                   |
| Metastases to bone marrow            |
| Metastases to breast                 |
| Metastases to central nervous system |
| Metastases to chest wall             |
| Metastases to diaphragm              |
| Metastases to Eustachian tube        |
| Metastases to eye                    |
| Metastases to fallopian tube         |
| Metastases to gallbladder            |
| Metastases to gastrointestinal tract |
| Metastases to heart                  |
| Metastases to kidney                 |

|                                          |
|------------------------------------------|
| Metastases to large intestine            |
| Metastases to larynx                     |
| Metastases to liver                      |
| Metastases to lung                       |
| Metastases to lymph nodes                |
| Metastases to meninges                   |
| Metastases to mouth                      |
| Metastases to muscle                     |
| Metastases to nasal sinuses              |
| Metastases to neck                       |
| Metastases to nervous system             |
| Metastases to oesophagus                 |
| Metastases to ovary                      |
| Metastases to pancreas                   |
| Metastases to pelvis                     |
| Metastases to penis                      |
| Metastases to perineum                   |
| Metastases to peripheral nervous system  |
| Metastases to peripheral vascular system |
| Metastases to peritoneum                 |
| Metastases to pharynx                    |
| Metastases to pituitary gland            |
| Metastases to placenta                   |
| Metastases to pleura                     |
| Metastases to prostate                   |
| Metastases to rectum                     |
| Metastases to reproductive organ         |
| Metastases to retroperitoneum            |
| Metastases to salivary gland             |
| Metastases to skin                       |
| Metastases to small intestine            |
| Metastases to soft tissue                |
| Metastases to spine                      |
| Metastases to spleen                     |
| Metastases to stomach                    |
| Metastases to testicle                   |
| Metastases to the mediastinum            |
| Metastases to the respiratory system     |
| Metastases to thorax                     |
| Metastases to thyroid                    |
| Metastases to trachea                    |
| Metastases to urinary tract              |
| Metastases to uterus                     |
| Metastasis                               |

|                                         |
|-----------------------------------------|
| Metastatic bronchial carcinoma          |
| Metastatic carcinoid tumour             |
| Metastatic carcinoma of the bladder     |
| Metastatic choriocarcinoma              |
| Metastatic gastric cancer               |
| Metastatic glioma                       |
| Metastatic lymphoma                     |
| Metastatic malignant melanoma           |
| Metastatic neoplasm                     |
| Metastatic ocular melanoma              |
| Metastatic renal cell carcinoma         |
| Metastatic salivary gland cancer        |
| Metastatic squamous cell carcinoma      |
| Metastatic uterine cancer               |
| Mixed astrocytoma-ependymoma            |
| Mixed hepatocellular cholangiocarcinoma |
| Mixed oligo-astrocytoma                 |
| Mixed salivary tumour                   |
| Monocytic leukaemia in remission        |
| Mucinous endometrial carcinoma          |
| Mucoepidermoid carcinoma                |
| Mueller's mixed tumour                  |
| Multiple myeloma                        |
| Muscle neoplasm                         |
| Mycosis fungoides                       |
| Mycosis fungoides recurrent             |
| Mycosis fungoides refractory            |
| Mycosis fungoides stage I               |
| Mycosis fungoides stage II              |
| Mycosis fungoides stage III             |
| Mycosis fungoides stage IV              |
| Myeloblastoma                           |
| Myeloid leukaemia                       |
| Myeloid leukaemia in remission          |
| Myeloma recurrence                      |
| Nasal cavity cancer                     |
| Nasal neoplasm                          |
| Nasal sinus cancer                      |
| Nasopharyngeal cancer                   |
| Nasopharyngeal cancer recurrent         |
| Nasopharyngeal cancer stage 0           |
| Nasopharyngeal cancer stage I           |
| Nasopharyngeal cancer stage II          |
| Nasopharyngeal cancer stage III         |

|                                                |
|------------------------------------------------|
| Nasopharyngeal cancer stage IV                 |
| Natural killer-cell leukaemia                  |
| Natural killer-cell lymphoblastic lymphoma     |
| Neonatal leukaemia                             |
| Neonatal neuroblastoma                         |
| Neoplasm                                       |
| Neoplasm malignant                             |
| Neoplasm of appendix                           |
| Neoplasm of cornea unspecified malignancy      |
| Neoplasm of orbit                              |
| Neoplasm of thymus                             |
| Neoplasm progression                           |
| Neoplasm prostate                              |
| Neoplasm recurrence                            |
| Neoplasm skin                                  |
| Nephroblastoma                                 |
| Nervous system neoplasm                        |
| Neurilemmoma malignant                         |
| Neuroblastoma                                  |
| Neuroblastoma recurrent                        |
| Neuroectodermal neoplasm                       |
| Neuroendocrine carcinoma                       |
| Neuroendocrine carcinoma metastatic            |
| Neuroendocrine carcinoma of the skin           |
| Neuroendocrine tumour                          |
| Neurofibrosarcoma                              |
| Neurofibrosarcoma metastatic                   |
| Neurofibrosarcoma non-metastatic               |
| Neurofibrosarcoma recurrent                    |
| Neurotensinoma                                 |
| Nipple neoplasm                                |
| Nodal marginal zone B-cell lymphoma            |
| Nodal marginal zone B-cell lymphoma recurrent  |
| Nodal marginal zone B-cell lymphoma refractory |
| Nodal marginal zone B-cell lymphoma stage I    |
| Nodal marginal zone B-cell lymphoma stage II   |
| Nodal marginal zone B-cell lymphoma stage III  |
| Nodal marginal zone B-cell lymphoma stage IV   |
| Non-Hodgkin's lymphoma                         |
| Non-Hodgkin's lymphoma metastatic              |
| Non-Hodgkin's lymphoma recurrent               |
| Non-Hodgkin's lymphoma refractory              |
| Non-Hodgkin's lymphoma stage I                 |
| Non-Hodgkin's lymphoma stage II                |

|                                                                    |
|--------------------------------------------------------------------|
| Non-Hodgkin's lymphoma stage III                                   |
| Non-Hodgkin's lymphoma stage IV                                    |
| Non-Hodgkin's lymphoma transformed recurrent                       |
| Non-Hodgkin's lymphoma unspecified histology aggressive            |
| Non-Hodgkin's lymphoma unspecified histology aggressive recurrent  |
| Non-Hodgkin's lymphoma unspecified histology aggressive refractory |
| Non-Hodgkin's lymphoma unspecified histology aggressive stage I    |
| Non-Hodgkin's lymphoma unspecified histology aggressive stage II   |
| Non-Hodgkin's lymphoma unspecified histology aggressive stage III  |
| Non-Hodgkin's lymphoma unspecified histology aggressive stage IV   |
| Non-Hodgkin's lymphoma unspecified histology indolent              |
| Non-Hodgkin's lymphoma unspecified histology indolent stage I      |
| Non-Hodgkin's lymphoma unspecified histology indolent stage II     |
| Non-Hodgkin's lymphoma unspecified histology indolent stage III    |
| Non-Hodgkin's lymphoma unspecified histology indolent stage IV     |
| Non-renal cell carcinoma of kidney                                 |
| Non-secretory adenoma of pituitary                                 |
| Non-small cell lung cancer                                         |
| Non-small cell lung cancer metastatic                              |
| Non-small cell lung cancer recurrent                               |
| Non-small cell lung cancer stage 0                                 |
| Non-small cell lung cancer stage I                                 |
| Non-small cell lung cancer stage II                                |
| Non-small cell lung cancer stage III                               |
| Non-small cell lung cancer stage IIIa                              |
| Non-small cell lung cancer stage IIIb                              |
| Non-small cell lung cancer stage IV                                |
| Nongerminomatous germ cell tumour of the CNS                       |
| Ocular cancer metastatic                                           |
| Ocular haemangiopericytoma                                         |
| Ocular neoplasm                                                    |
| Oesophageal adenocarcinoma                                         |
| Oesophageal adenocarcinoma metastatic                              |
| Oesophageal adenocarcinoma recurrent                               |
| Oesophageal adenocarcinoma stage 0                                 |
| Oesophageal adenocarcinoma stage I                                 |
| Oesophageal adenocarcinoma stage II                                |
| Oesophageal adenocarcinoma stage III                               |
| Oesophageal adenocarcinoma stage IV                                |
| Oesophageal cancer metastatic                                      |
| Oesophageal carcinoma                                              |
| Oesophageal carcinoma recurrent                                    |
| Oesophageal carcinoma stage 0                                      |
| Oesophageal neoplasm                                               |

|                                                |
|------------------------------------------------|
| Oesophageal squamous cell carcinoma            |
| Oesophageal squamous cell carcinoma metastatic |
| Oesophageal squamous cell carcinoma recurrent  |
| Oesophageal squamous cell carcinoma stage 0    |
| Oesophageal squamous cell carcinoma stage I    |
| Oesophageal squamous cell carcinoma stage II   |
| Oesophageal squamous cell carcinoma stage III  |
| Oesophageal squamous cell carcinoma stage IV   |
| Oligodendroglioma                              |
| Optic nerve glioma                             |
| Optic nerve neoplasm                           |
| Optic tract glioma                             |
| Oral cavity cancer metastatic                  |
| Oral neoplasm                                  |
| Oropharyngeal cancer recurrent                 |
| Oropharyngeal cancer stage 0                   |
| Oropharyngeal cancer stage I                   |
| Oropharyngeal cancer stage II                  |
| Oropharyngeal cancer stage III                 |
| Oropharyngeal cancer stage IV                  |
| Oropharyngeal cancer stage unspecified         |
| Oropharyngeal neoplasm                         |
| Osteosarcoma localised                         |
| Osteosarcoma metastatic                        |
| Osteosarcoma recurrent                         |
| Otic cancer metastatic                         |
| Ovarian cancer                                 |
| Ovarian cancer metastatic                      |
| Ovarian cancer recurrent                       |
| Ovarian cancer stage I                         |
| Ovarian cancer stage II                        |
| Ovarian cancer stage III                       |
| Ovarian cancer stage IV                        |
| Ovarian dysgerminoma stage I                   |
| Ovarian dysgerminoma stage II                  |
| Ovarian dysgerminoma stage III                 |
| Ovarian dysgerminoma stage IV                  |
| Ovarian dysgerminoma stage unspecified         |
| Ovarian embryonal carcinoma                    |
| Ovarian epithelial cancer                      |
| Ovarian epithelial cancer metastatic           |
| Ovarian epithelial cancer recurrent            |
| Ovarian epithelial cancer stage I              |
| Ovarian epithelial cancer stage II             |

|                                                     |
|-----------------------------------------------------|
| Ovarian epithelial cancer stage III                 |
| Ovarian epithelial cancer stage IV                  |
| Ovarian germ cell cancer                            |
| Ovarian germ cell cancer stage I                    |
| Ovarian germ cell cancer stage II                   |
| Ovarian germ cell cancer stage III                  |
| Ovarian germ cell cancer stage IV                   |
| Ovarian germ cell choriocarcinoma stage I           |
| Ovarian germ cell choriocarcinoma stage II          |
| Ovarian germ cell choriocarcinoma stage III         |
| Ovarian germ cell choriocarcinoma stage IV          |
| Ovarian germ cell embryonal carcinoma stage I       |
| Ovarian germ cell embryonal carcinoma stage II      |
| Ovarian germ cell embryonal carcinoma stage III     |
| Ovarian germ cell embryonal carcinoma stage IV      |
| Ovarian germ cell endodermal sinus tumour stage I   |
| Ovarian germ cell endodermal sinus tumour stage II  |
| Ovarian germ cell endodermal sinus tumour stage III |
| Ovarian germ cell endodermal sinus tumour stage IV  |
| Ovarian germ cell polyembryoma stage I              |
| Ovarian germ cell polyembryoma stage II             |
| Ovarian germ cell polyembryoma stage III            |
| Ovarian germ cell polyembryoma stage IV             |
| Ovarian germ cell teratoma stage I                  |
| Ovarian germ cell teratoma stage II                 |
| Ovarian germ cell teratoma stage III                |
| Ovarian germ cell teratoma stage IV                 |
| Ovarian granulosa-theca cell tumour                 |
| Ovarian low malignant potential tumour              |
| Ovarian neoplasm                                    |
| Ovarian stromal cancer                              |
| Paget's disease of penis                            |
| Paget's disease of skin                             |
| Paget's disease of the breast                       |
| Paget's disease of the vulva                        |
| Pancoast's tumour                                   |
| Pancreatic carcinoma                                |
| Pancreatic carcinoma metastatic                     |
| Pancreatic carcinoma non-resectable                 |
| Pancreatic carcinoma recurrent                      |
| Pancreatic carcinoma resectable                     |
| Pancreatic carcinoma stage 0                        |
| Pancreatic carcinoma stage I                        |
| Pancreatic carcinoma stage II                       |



|                                                               |
|---------------------------------------------------------------|
| Pancreatic carcinoma stage III                                |
| Pancreatic carcinoma stage IV                                 |
| Pancreatic neoplasm                                           |
| Pancreatic neuroendocrine tumour                              |
| Pancreatic neuroendocrine tumour metastatic                   |
| Pancreatic sarcoma                                            |
| Papillary serous endometrial carcinoma                        |
| Paraganglion neoplasm                                         |
| Paraganglion neoplasm malignant                               |
| Paranasal sinus and nasal cavity malignant neoplasm           |
| Paranasal sinus and nasal cavity malignant neoplasm recurrent |
| Paranasal sinus and nasal cavity malignant neoplasm stage 0   |
| Paranasal sinus and nasal cavity malignant neoplasm stage I   |
| Paranasal sinus and nasal cavity malignant neoplasm stage II  |
| Paranasal sinus and nasal cavity malignant neoplasm stage III |
| Paranasal sinus and nasal cavity malignant neoplasm stage IV  |
| Paranasal sinus neoplasm                                      |
| Parathyroid tumour                                            |
| Parathyroid tumour malignant                                  |
| Pelvic neoplasm                                               |
| Penile malignant neoplasm                                     |
| Penile neoplasm                                               |
| Penis carcinoma                                               |
| Penis carcinoma metastatic                                    |
| Penis carcinoma recurrent                                     |
| Penis carcinoma stage I                                       |
| Penis carcinoma stage II                                      |
| Penis carcinoma stage III                                     |
| Penis carcinoma stage IV                                      |
| Pericardial mesothelioma malignant advanced                   |
| Pericardial mesothelioma malignant localised                  |
| Pericardial mesothelioma malignant recurrent                  |
| Pericardial neoplasm                                          |
| Peripheral nervous system neoplasm                            |
| Peripheral neuroepithelioma                                   |
| Peripheral neuroepithelioma of bone                           |
| Peripheral neuroepithelioma of bone metastatic                |
| Peripheral neuroepithelioma of bone recurrent                 |
| Peripheral neuroepithelioma of soft tissue                    |
| Peripheral T-cell lymphoma unspecified                        |
| Peripheral T-cell lymphoma unspecified recurrent              |
| Peripheral T-cell lymphoma unspecified refractory             |
| Peripheral T-cell lymphoma unspecified stage I                |
| Peripheral T-cell lymphoma unspecified stage II               |

|                                                  |
|--------------------------------------------------|
| Peripheral T-cell lymphoma unspecified stage III |
| Peripheral T-cell lymphoma unspecified stage IV  |
| Peritoneal carcinoma metastatic                  |
| Peritoneal mesothelioma malignant                |
| Peritoneal mesothelioma malignant advanced       |
| Peritoneal mesothelioma malignant recurrent      |
| Peritoneal neoplasm                              |
| Peritoneal sarcoma                               |
| Phaeochromocytoma                                |
| Phaeochromocytoma malignant                      |
| Pharyngeal cancer metastatic                     |
| Pharyngeal cancer recurrent                      |
| Pharyngeal cancer stage 0                        |
| Pharyngeal cancer stage I                        |
| Pharyngeal cancer stage II                       |
| Pharyngeal cancer stage III                      |
| Pharyngeal cancer stage IV                       |
| Pharyngeal cancer stage unspecified              |
| Pharyngeal neoplasm                              |
| Phyllodes tumour                                 |
| Pineal germinoma                                 |
| Pineal neoplasm                                  |
| Pineal parenchymal neoplasm malignant            |
| Pinealoblastoma                                  |
| Pinealoma                                        |
| Pituitary cancer metastatic                      |
| Pituitary neoplasm malignant recurrent           |
| Pituitary tumour                                 |
| Pituitary tumour recurrent                       |
| Placental neoplasm                               |
| Plasmablastic lymphoma                           |
| Plasmacytoma                                     |
| Pleural mesothelioma                             |
| Pleural mesothelioma malignant                   |
| Pleural mesothelioma malignant advanced          |
| Pleural mesothelioma malignant recurrent         |
| Pleural neoplasm                                 |
| Pleural sarcoma                                  |
| Porocarcinoma                                    |
| Posttransplant lymphoproliferative disorder      |
| Poststeroid cancer                               |
| Precursor B-lymphoblastic lymphoma               |
| Precursor B-lymphoblastic lymphoma recurrent     |
| Precursor B-lymphoblastic lymphoma refractory    |

|                                                         |
|---------------------------------------------------------|
| Precursor B-lymphoblastic lymphoma stage I              |
| Precursor B-lymphoblastic lymphoma stage II             |
| Precursor B-lymphoblastic lymphoma stage III            |
| Precursor B-lymphoblastic lymphoma stage IV             |
| Precursor T-lymphoblastic lymphoma/leukaemia            |
| Precursor T-lymphoblastic lymphoma/leukaemia recurrent  |
| Precursor T-lymphoblastic lymphoma/leukaemia refractory |
| Precursor T-lymphoblastic lymphoma/leukaemia stage I    |
| Precursor T-lymphoblastic lymphoma/leukaemia stage II   |
| Precursor T-lymphoblastic lymphoma/leukaemia stage III  |
| Precursor T-lymphoblastic lymphoma/leukaemia stage IV   |
| Primary effusion lymphoma                               |
| Primary mediastinal large B-cell lymphoma               |
| Primary mediastinal large B-cell lymphoma recurrent     |
| Primary mediastinal large B-cell lymphoma refractory    |
| Primary mediastinal large B-cell lymphoma stage I       |
| Primary mediastinal large B-cell lymphoma stage II      |
| Primary mediastinal large B-cell lymphoma stage III     |
| Primary mediastinal large B-cell lymphoma stage IV      |
| Primitive neuroectodermal tumour                        |
| Primitive neuroectodermal tumour metastatic             |
| Prolactin-producing pituitary tumour                    |
| Prolymphocytic leukaemia                                |
| Prostate cancer                                         |
| Prostate cancer metastatic                              |
| Prostate cancer recurrent                               |
| Prostate cancer stage 0                                 |
| Prostate cancer stage I                                 |
| Prostate cancer stage II                                |
| Prostate cancer stage III                               |
| Prostate cancer stage IV                                |
| Pseudosarcoma                                           |
| Rectal cancer                                           |
| Rectal cancer metastatic                                |
| Rectal cancer recurrent                                 |
| Rectal cancer stage 0                                   |
| Rectal cancer stage I                                   |
| Rectal cancer stage II                                  |
| Rectal cancer stage III                                 |
| Rectal cancer stage IV                                  |
| Rectal neoplasm                                         |
| Rectosigmoid cancer                                     |
| Rectosigmoid cancer metastatic                          |
| Rectosigmoid cancer recurrent                           |

|                                     |
|-------------------------------------|
| Rectosigmoid cancer stage 0         |
| Rectosigmoid cancer stage I         |
| Rectosigmoid cancer stage II        |
| Rectosigmoid cancer stage III       |
| Rectosigmoid cancer stage IV        |
| Recurrent cancer                    |
| Refractory cancer                   |
| Renal cancer                        |
| Renal cancer metastatic             |
| Renal cancer recurrent              |
| Renal cancer stage I                |
| Renal cancer stage II               |
| Renal cancer stage III              |
| Renal cancer stage IV               |
| Renal cell carcinoma                |
| Renal cell carcinoma recurrent      |
| Renal cell carcinoma stage I        |
| Renal cell carcinoma stage II       |
| Renal cell carcinoma stage III      |
| Renal cell carcinoma stage IV       |
| Renal neoplasm                      |
| Respiratory tract carcinoma in situ |
| Respiratory tract neoplasm          |
| Retinal melanoma                    |
| Retinal neoplasm                    |
| Retinoblastoma                      |
| Retinoblastoma bilateral            |
| Retinoblastoma unilateral           |
| Retro-orbital neoplasm              |
| Retroperitoneal cancer              |
| Retroperitoneal neoplasm            |
| Retroperitoneal neoplasm metastatic |
| Rhabdoid tumour of the kidney       |
| Rhabdomyosarcoma                    |
| Rhabdomyosarcoma recurrent          |
| Richter's syndrome                  |
| Salivary gland cancer               |
| Salivary gland cancer recurrent     |
| Salivary gland cancer stage 0       |
| Salivary gland cancer stage I       |
| Salivary gland cancer stage II      |
| Salivary gland cancer stage III     |
| Salivary gland cancer stage IV      |
| Salivary gland neoplasm             |

|                                              |
|----------------------------------------------|
| Sarcoma                                      |
| Sarcoma metastatic                           |
| Sarcoma of skin                              |
| Sarcoma uterus                               |
| Sarcomatosis                                 |
| Scrotal cancer                               |
| Sebaceous carcinoma                          |
| Secretory adenoma of pituitary               |
| Seminoma                                     |
| Signet-ring cell carcinoma                   |
| Sinus cancer metastatic                      |
| Skin cancer                                  |
| Skin cancer metastatic                       |
| Skin neoplasm bleeding                       |
| Small cell carcinoma                         |
| Small cell carcinoma of the cervix           |
| Small cell lung cancer extensive stage       |
| Small cell lung cancer limited stage         |
| Small cell lung cancer metastatic            |
| Small cell lung cancer recurrent             |
| Small cell lung cancer stage unspecified     |
| Small intestine carcinoma                    |
| Small intestine carcinoma metastatic         |
| Small intestine carcinoma non-resectable     |
| Small intestine carcinoma recurrent          |
| Small intestine carcinoma resectable         |
| Small intestine carcinoma stage 0            |
| Small intestine carcinoma stage I            |
| Small intestine carcinoma stage II           |
| Small intestine carcinoma stage III          |
| Small intestine carcinoma stage IV           |
| Small intestine leiomyosarcoma               |
| Smooth muscle cell neoplasm                  |
| Soft tissue neoplasm                         |
| Solid pseudopapillary tumour of the pancreas |
| Somatostatinoma                              |
| Spinal cord neoplasm                         |
| Spinal meningioma malignant                  |
| Spindle cell sarcoma                         |
| Splenic marginal zone lymphoma               |
| Splenic marginal zone lymphoma recurrent     |
| Splenic marginal zone lymphoma refractory    |
| Splenic marginal zone lymphoma stage I       |
| Splenic marginal zone lymphoma stage II      |

|                                                  |
|--------------------------------------------------|
| Splenic marginal zone lymphoma stage III         |
| Splenic marginal zone lymphoma stage IV          |
| Splenic neoplasm malignancy unspecified          |
| Squamous cell carcinoma                          |
| Squamous cell carcinoma of skin                  |
| Squamous cell carcinoma of the cervix            |
| Squamous endometrial carcinoma                   |
| Stewart-Treves syndrome                          |
| Superficial spreading melanoma stage I           |
| Superficial spreading melanoma stage II          |
| Superficial spreading melanoma stage III         |
| Superficial spreading melanoma stage IV          |
| Superficial spreading melanoma stage unspecified |
| Synovial sarcoma                                 |
| Synovial sarcoma metastatic                      |
| Synovial sarcoma non-metastatic                  |
| Synovial sarcoma recurrent                       |
| T-cell chronic lymphocytic leukaemia             |
| T-cell lymphoma                                  |
| T-cell lymphoma recurrent                        |
| T-cell lymphoma refractory                       |
| T-cell lymphoma stage I                          |
| T-cell lymphoma stage II                         |
| T-cell lymphoma stage III                        |
| T-cell lymphoma stage IV                         |
| T-cell prolymphocytic leukaemia                  |
| T-cell type acute leukaemia                      |
| T-cell unclassifiable lymphoma high grade        |
| T-cell unclassifiable lymphoma low grade         |
| Tendon neoplasm                                  |
| Teratoma                                         |
| Teratoma of testis                               |
| Testicular cancer metastatic                     |
| Testicular choriocarcinoma                       |
| Testicular choriocarcinoma recurrent             |
| Testicular choriocarcinoma stage I               |
| Testicular choriocarcinoma stage II              |
| Testicular choriocarcinoma stage III             |
| Testicular embryonal carcinoma                   |
| Testicular embryonal carcinoma stage I           |
| Testicular embryonal carcinoma stage II          |
| Testicular embryonal carcinoma stage III         |
| Testicular germ cell cancer                      |
| Testicular germ cell cancer metastatic           |

|                                                        |
|--------------------------------------------------------|
| Testicular germ cell tumour mixed stage I              |
| Testicular germ cell tumour mixed stage II             |
| Testicular germ cell tumour mixed stage III            |
| Testicular leiomyosarcoma                              |
| Testicular malignant teratoma stage I                  |
| Testicular malignant teratoma stage II                 |
| Testicular malignant teratoma stage III                |
| Testicular neoplasm                                    |
| Testicular seminoma (pure)                             |
| Testicular seminoma (pure) stage I                     |
| Testicular seminoma (pure) stage II                    |
| Testicular seminoma (pure) stage III                   |
| Testicular yolk sac tumour stage I                     |
| Testicular yolk sac tumour stage II                    |
| Testicular yolk sac tumour stage III                   |
| Testis cancer                                          |
| Testis cancer recurrent                                |
| Throat cancer                                          |
| Thymic cancer metastatic                               |
| Thymoma                                                |
| Thymoma malignant                                      |
| Thymoma malignant recurrent                            |
| Thyroid cancer                                         |
| Thyroid cancer metastatic                              |
| Thyroid cancer recurrent                               |
| Thyroid cancer stage 0                                 |
| Thyroid cancer stage I                                 |
| Thyroid cancer stage II                                |
| Thyroid cancer stage III                               |
| Thyroid cancer stage IV                                |
| Thyroid neoplasm                                       |
| Thyroid stimulating hormone-producing pituitary tumour |
| Tongue cancer metastatic                               |
| Tongue cancer recurrent                                |
| Tongue carcinoma stage 0                               |
| Tongue carcinoma stage I                               |
| Tongue carcinoma stage II                              |
| Tongue carcinoma stage III                             |
| Tongue carcinoma stage IV                              |
| Tongue neoplasm                                        |
| Tongue neoplasm malignant stage unspecified            |
| Tonsil cancer                                          |
| Tonsillar neoplasm                                     |
| Tracheal cancer                                        |

|                                                                   |
|-------------------------------------------------------------------|
| Tracheal neoplasm                                                 |
| Transitional cell cancer of renal pelvis and ureter metastatic    |
| Transitional cell cancer of the renal pelvis and ureter           |
| Transitional cell cancer of the renal pelvis and ureter localised |
| Transitional cell cancer of the renal pelvis and ureter recurrent |
| Transitional cell cancer of the renal pelvis and ureter regional  |
| Transitional cell carcinoma                                       |
| Transitional cell carcinoma metastatic                            |
| Undifferentiated sarcoma                                          |
| Ureteral neoplasm                                                 |
| Ureteric cancer                                                   |
| Ureteric cancer local                                             |
| Ureteric cancer metastatic                                        |
| Ureteric cancer recurrent                                         |
| Ureteric cancer regional                                          |
| Urethral cancer                                                   |
| Urethral cancer local                                             |
| Urethral cancer metastatic                                        |
| Urethral cancer recurrent                                         |
| Urethral cancer regional                                          |
| Urethral neoplasm                                                 |
| Urinary bladder sarcoma                                           |
| Urinary tract carcinoma in situ                                   |
| Urinary tract neoplasm                                            |
| Uterine cancer                                                    |
| Uterine carcinoma in situ                                         |
| Uterine leiomyosarcoma                                            |
| Uterine neoplasm                                                  |
| Vaginal cancer                                                    |
| Vaginal cancer metastatic                                         |
| Vaginal cancer recurrent                                          |
| Vaginal cancer stage 0                                            |
| Vaginal cancer stage I                                            |
| Vaginal cancer stage II                                           |
| Vaginal cancer stage III                                          |
| Vaginal cancer stage IVa                                          |
| Vaginal cancer stage IVb                                          |
| Vaginal neoplasm                                                  |
| Vascular neoplasm                                                 |
| VIPoma                                                            |
| Vocal cord neoplasm                                               |
| Vulval cancer                                                     |
| Vulval cancer metastatic                                          |
| Vulval cancer recurrent                                           |



|                                             |
|---------------------------------------------|
| Vulval cancer stage 0                       |
| Vulval cancer stage I                       |
| Vulval cancer stage II                      |
| Vulval cancer stage III                     |
| Vulval cancer stage IV                      |
| Vulval neoplasm                             |
| Waldenstrom's macroglobulinaemia            |
| Waldenstrom's macroglobulinaemia recurrent  |
| Waldenstrom's macroglobulinaemia refractory |
| Waldenstrom's macroglobulinaemia stage I    |
| Waldenstrom's macroglobulinaemia stage II   |
| Waldenstrom's macroglobulinaemia stage III  |
| Waldenstrom's macroglobulinaemia stage IV   |
| Yolk sac tumour site unspecified            |

MedDRA, Medical Dictionary for Regulatory Activities; SMQ, Standardized MedDRA Queries.

**Supplementary Table S2.** SIR for overall malignancy and for specific anatomic sites in tocilizumab-treated patients (US and Non-US patients combined)

| Cancer site                    | Observed cases | Using SEER as Reference |              |              | Using GLOBOCAN as Reference |              |              |
|--------------------------------|----------------|-------------------------|--------------|--------------|-----------------------------|--------------|--------------|
|                                |                | SIR                     | Lower 95% CI | Upper 95% CI | SIR                         | Lower 95% CI | Upper 95% CI |
| All sites                      | 135            | 1.17                    | 0.98         | 1.39         | 1.80                        | 1.51         | 2.13         |
| Nasopharynx                    | 2              | 14.24                   | 1.60         | 51.40        | 6.68                        | 0.75         | 24.13        |
| Oesophagus                     | 2              | 2.56                    | 0.29         | 9.23         | 1.01                        | 0.11         | 3.66         |
| Stomach                        | 4              | 2.71                    | 0.73         | 6.93         | 1.00                        | 0.27         | 2.57         |
| Colon and rectum               | 10             | 0.94                    | 0.45         | 1.73         | 1.41                        | 0.68         | 2.60         |
| Pancreas                       | 3              | 1.21                    | 0.24         | 3.53         | 1.72                        | 0.35         | 5.02         |
| Larynx                         | 1              | 1.42                    | 0.02         | 7.89         | 2.14                        | 0.03         | 11.90        |
| Lung and bronchus              | 29             | 2.02                    | 1.35         | 2.90         | 3.10                        | 2.07         | 4.45         |
| Melanoma of the skin           | 4              | 0.89                    | 0.24         | 2.28         | 2.38                        | 0.64         | 6.09         |
| Breast                         | 20             | 0.66                    | 0.40         | 1.02         | 1.27                        | 0.77         | 1.96         |
| Cervix uteri                   | 5              | 2.91                    | 0.94         | 6.79         | 1.97                        | 0.63         | 4.59         |
| Corpus uteri                   | 6              | 1.00                    | 0.37         | 2.18         | 1.55                        | 0.57         | 3.38         |
| Ovary                          | 4              | 1.34                    | 0.36         | 3.44         | 2.01                        | 0.54         | 5.15         |
| Prostate                       | 12             | 1.26                    | 0.65         | 2.20         | 3.58                        | 1.85         | 6.26         |
| Urinary bladder                | 4              | 1.25                    | 0.34         | 3.21         | 2.57                        | 0.69         | 6.58         |
| Kidney                         | 2              | 0.64                    | 0.07         | 2.32         | 1.03                        | 0.12         | 3.72         |
| Brain and other nervous system | 2              | 1.55                    | 0.17         | 5.61         | 1.57                        | 0.18         | 5.69         |
| Thyroid                        | 4              | 1.25                    | 0.34         | 3.20         | 1.97                        | 0.53         | 5.04         |
| Non-Hodgkin's lymphoma         | 5              | 1.17                    | 0.38         | 2.73         | 2.79                        | 0.90         | 6.51         |
| Leukaemia                      | 2              | 0.90                    | 0.10         | 3.26         | 1.47                        | 0.17         | 5.31         |

Age- and sex-specific malignancy rates from the Surveillance, Epidemiology, and End Results (SEER) Program for the US National Cancer Institute (years 2000-2008) and GLOBOCAN (year 2012) were used to calculate the expected number of site-specific malignancies for combined US and non-US patients. SIR, standardised incidence ratio.
